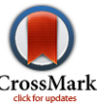

Correction

# Correction: *MC1R* Genotype and Plumage Colouration in the Zebra Finch (*Taeniopygia guttata*): Population Structure Generates Artefactual Associations

The PLOS ONE Staff

Figure 4 is missing from the original published article. The publisher apologizes for the error. Figure 4 can be viewed here.

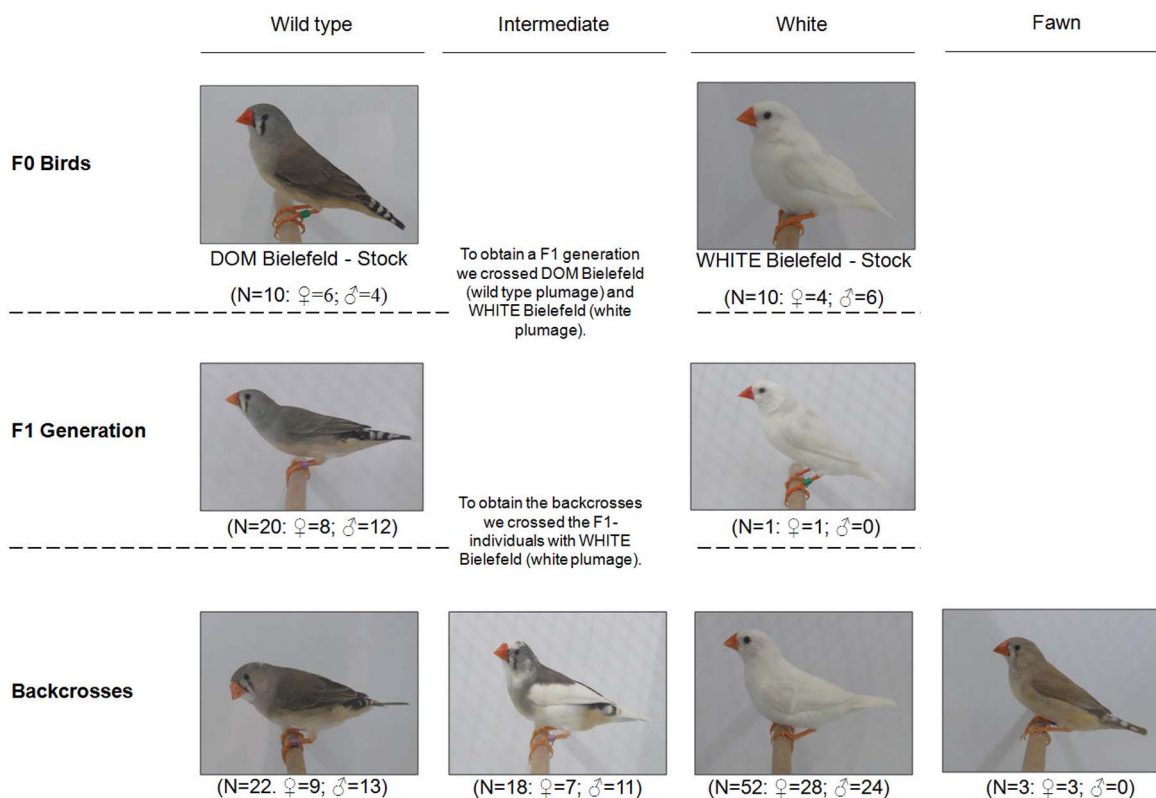

**Figure 4. Details of the controlled breeding experiment between wild type and white zebra finches, including numbers of F1 individuals and backcrosses together with their plumage coloration phenotypes.** The photographs were taken by ETK. doi:10.1371/journal.pone.0086591.g004

Reference

1. Hoffman JI, Krause ET, Lehmann K, Krüger O (2014) *MC1R* Genotype and Plumage Colouration in the Zebra Finch (*Taeniopygia guttata*): Population Structure Generates Artefactual Associations. PLoS ONE 9(1): e86519. doi:10.1371/journal.pone.0086519

**Citation:** The PLOS ONE Staff (2014) Correction: *MC1R* Genotype and Plumage Colouration in the Zebra Finch (*Taeniopygia guttata*): Population Structure Generates Artefactual Associations. PLoS ONE 9(4): e96881. doi:10.1371/journal.pone.0096881

**Published** April 30, 2014

**Copyright:** © 2014 The PLOS ONE Staff. This is an open-access article distributed under the terms of the Creative Commons Attribution License, which permits unrestricted use, distribution, and reproduction in any medium, provided the original author and source are credited.
